# Supplementary material for: Predicting the photon energy of quasi-2D lead halide perovskites from the precursor composition through machine learning
Source: Royal Society of Chemistry journal article supplement (doi:10.1039/d2na00052k), 2022-01-01
Supplement: d2na00052k1.pdf [file d2na00052k1.pdf]

## Supporting information

### Predicting the photon energy of quasi-2D lead halide perovskites from the precursor composition through machine learning

Wei Wang<sup>#a,b</sup>, Yueqiao Li<sup>#a,b</sup>, Ang Zou<sup>a,b</sup>, Haochen Shi<sup>a,b</sup>, Xiaofeng Huang<sup>a,b</sup>, Yaoyao Li<sup>a,b</sup>, Dong  
Wei<sup>c</sup>, Bo Qiao<sup>a,b</sup>, Suling Zhao<sup>a,b</sup>, Zheng Xu<sup>a,b</sup>, Dandan Song<sup>\*a,b</sup>

<sup>a</sup> Key Laboratory of Luminescence and Optical Information, Beijing Jiaotong University, Ministry  
of Education, Beijing 100044, China

<sup>b</sup> Institute of Optoelectronics Technology, Beijing Jiaotong University, Beijing 100044, China

<sup>c</sup> College of Physics and Energy, Fujian Normal University, Fuzhou, 350117, China

<sup>#</sup>These authors contributed equally: Wei Wang, Yueqiao Li.

Address correspondence to E-mail: [ddsong@bjtu.edu.cn](mailto:ddsong@bjtu.edu.cn)

Table S1 The compositions and the experimental photon energy values of the perovskites from  
literature.

The column named L represents the name of the organic spacer cation. The columns named MA, FA, Cs,  
Cl, Br are the ions ratios under the conditions the sum of MA, FA and Cs equals to 1 and the sum of Cl  
and Br equals 1. P2L and P2A represent the molar ratio of Pb<sup>2+</sup> to organic spacer cation (abbreviated as  
P2L) and of Pb<sup>2+</sup> to organic cation (abbreviated as P2A) in the precursor solution, respectively. The  
photon energy was calculated from the emission peak wavelength (most of them are electroluminescence  
wavelengths).

| ID | L <sup>a</sup> | MA | FA | Cs | Cl | Br | P2L | P2A  | Photon<br>energy | Ref |
|----|----------------|----|----|----|----|----|-----|------|------------------|-----|
| 1  | PEA            | 0  | 0  | 1  | 0  | 1  | 2.5 | 0.77 | 2.40             | 1   |
| 2  | PEA            | 0  | 0  | 1  | 0  | 1  | 2.5 | 0.63 | 2.39             | 1   |
| 3  | PEA            | 0  | 0  | 1  | 0  | 1  | 2.5 | 0.53 | 2.40             | 1   |

---

|    |                                         |     |     |     |      |      |       |      |      |    |
|----|-----------------------------------------|-----|-----|-----|------|------|-------|------|------|----|
| 4  | PEA                                     | 0   | 0   | 1   | 0    | 1    | 2.5   | 0.45 | 2.40 | 1  |
| 5  | BA                                      | 0   | 0   | 1   | 0    | 1    | 2.5   | 0.83 | 2.43 | 2  |
| 6  | PEA                                     | 0.2 | 0   | 0.8 | 0    | 1    | 2     | 1.33 | 2.38 | 3  |
| 7  | PEA                                     | 0   | 0   | 1   | 0    | 1    | 1.5   | 1.5  | 2.59 | 4  |
| 8  | PEA                                     | 0   | 1   | 0   | 0    | 1    | 1     | 2    | 2.34 | 5  |
| 9  | PEA                                     | 0   | 1   | 0   | 0    | 1    | 2.5   | 1.25 | 2.32 | 5  |
| 10 | PEA                                     | 0   | 0   | 1   | 0    | 1    | 2.5   | 1    | 2.45 | 6  |
| 11 | PEA                                     | 0   | 0   | 1   | 0    | 1    | 2.5   | 0.91 | 2.40 | 7  |
| 12 | PEA                                     | 0   | 0   | 1   | 0    | 1    | 2     | 1    | 2.40 | 8  |
| 13 | BA                                      | 0   | 0   | 1   | 0.58 | 0.42 | 1.387 | 0.86 | 2.66 | 9  |
| 14 | BA                                      | 0   | 0   | 1   | 0.16 | 0.84 | 1.387 | 0.86 | 2.55 | 9  |
| 15 | BA                                      | 0   | 0   | 1   | 0    | 1    | 1.387 | 0.86 | 2.45 | 9  |
| 16 | PEA                                     | 0.5 | 0.5 | 0   | 0    | 1    | 2     | 1    | 2.38 | 10 |
| 17 | PEA                                     | 0   | 0   | 1   | 0    | 1    | 2     | 0.97 | 2.42 | 11 |
| 18 | PEA                                     | 0   | 0   | 1   | 0    | 1    | 0.91  | 1.1  | 2.62 | 12 |
| 19 | PEA                                     | 0   | 0   | 1   | 0    | 1    | 0.83  | 1.25 | 2.68 | 12 |
| 20 | PEA                                     | 0   | 1   | 0   | 0    | 1    | 2     | 1.33 | 2.36 | 13 |
| 21 | PMA                                     | 0   | 1   | 0   | 0    | 1    | 1.5   | 1.5  | 2.32 | 14 |
| 22 | PEA <sub>0.67</sub> NPA <sub>0.33</sub> | 0   | 0   | 1   | 0    | 1    | 1     | 1.5  | 2.56 | 15 |
| 23 | PA                                      | 0   | 0   | 1   | 0    | 1    | 1     | 1    | 2.55 | 16 |
| 24 | PBA                                     | 0   | 1   | 0   | 0    | 1    | 2.22  | 0.83 | 2.31 | 17 |
| 25 | PBA <sub>0.87</sub> PA <sub>0.13</sub>  | 0   | 1   | 0   | 0    | 1    | 1.92  | 0.83 | 2.32 | 17 |
| 26 | PBA <sub>0.76</sub> PA <sub>0.24</sub>  | 0   | 1   | 0   | 0    | 1    | 1.69  | 0.83 | 2.32 | 17 |
| 27 | PBA <sub>0.62</sub> PA <sub>0.38</sub>  | 0   | 1   | 0   | 0    | 1    | 1.37  | 0.83 | 2.37 | 17 |
| 28 | PEA                                     | 0   | 1   | 0   | 0    | 1    | 1.75  | 1.4  | 2.34 | 18 |
| 29 | BA                                      | 0   | 0   | 1   | 0    | 1    | 2     | 1    | 2.43 | 19 |
| 30 | BA                                      | 0   | 0   | 1   | 0    | 1    | 1.25  | 1    | 2.45 | 19 |
| 31 | BA                                      | 0   | 0   | 1   | 0    | 1    | 1     | 1    | 2.45 | 19 |
| 32 | P-PDA                                   | 0   | 0   | 1   | 0    | 1    | 1     | 2    | 2.68 | 20 |

---

---

|    |                                             |     |     |     |   |   |      |      |      |    |
|----|---------------------------------------------|-----|-----|-----|---|---|------|------|------|----|
| 33 | P-PDA                                       | 0   | 0   | 1   | 0 | 1 | 1.25 | 1.67 | 2.67 | 20 |
| 34 | P-PDA                                       | 0   | 0   | 1   | 0 | 1 | 1.5  | 1.5  | 2.60 | 20 |
| 35 | P-PDA                                       | 0   | 0   | 1   | 0 | 1 | 2    | 1.33 | 2.56 | 20 |
| 36 | P-PDA                                       | 0   | 0   | 1   | 0 | 1 | 2.5  | 1.25 | 2.50 | 20 |
| 37 | P-PDA <sub>0.875</sub> PEA <sub>0.125</sub> | 0   | 0   | 1   | 0 | 1 | 1.25 | 1.67 | 2.67 | 20 |
| 38 | P-PDA <sub>0.75</sub> PEA <sub>0.25</sub>   | 0   | 0   | 1   | 0 | 1 | 1.25 | 1.67 | 2.67 | 20 |
| 39 | P-PDA <sub>0.5</sub> PEA <sub>0.5</sub>     | 0   | 0   | 1   | 0 | 1 | 1.25 | 1.67 | 2.63 | 20 |
| 40 | P-PDA <sub>0.75</sub> PEA <sub>0.25</sub>   | 0   | 0   | 1   | 0 | 1 | 1.25 | 1.67 | 2.67 | 20 |
| 41 | 1-NMA                                       | 0   | 1   | 0   | 0 | 1 | 2    | 1    | 2.38 | 21 |
| 42 | PEA                                         | 0   | 1   | 0   | 0 | 1 | 2    | 1    | 2.37 | 21 |
| 43 | PBA                                         | 0   | 0.3 | 0.7 | 0 | 1 | 0.91 | 1    | 2.57 | 22 |
| 44 | PA <sub>0.15</sub> PEA <sub>0.01</sub>      | 0   | 0   | 1   | 0 | 1 | 0.97 | 1.03 | 2.54 | 23 |
| 45 | PA <sub>0.15</sub> PEA <sub>0.011</sub>     | 0   | 0   | 1   | 0 | 1 | 0.96 | 1.03 | 2.54 | 23 |
| 46 | PEA                                         | 1   | 0   | 0   | 0 | 1 | 2    | 1    | 2.44 | 24 |
| 47 | PEA                                         | 0.7 | 0.3 | 0   | 0 | 1 | 2    | 1    | 2.40 | 24 |
| 48 | PEA                                         | 0.3 | 0.7 | 0   | 0 | 1 | 2    | 1    | 2.38 | 24 |
| 49 | PEA                                         | 1   | 0   | 0   | 0 | 1 | 2    | 1.33 | 2.44 | 25 |
| 50 | PEA                                         | 1   | 0   | 0   | 0 | 1 | 1.33 | 1.33 | 2.36 | 25 |
| 51 | PEA                                         | 1   | 0   | 0   | 0 | 1 | 1    | 1.33 | 2.37 | 25 |
| 52 | PEA                                         | 1   | 0   | 0   | 0 | 1 | 0.8  | 1.33 | 2.44 | 25 |
| 53 | PEA                                         | 1   | 0   | 0   | 0 | 1 | 0.67 | 1.33 | 2.44 | 25 |
| 54 | PEA                                         | 1   | 0   | 0   | 0 | 1 | 0.8  | 1    | 2.40 | 25 |
| 55 | PEA                                         | 0   | 1   | 0   | 0 | 1 | 1.5  | 1.5  | 2.33 | 26 |
| 56 | PEA                                         | 0   | 0   | 1   | 0 | 1 | 1.67 | 1    | 2.44 | 27 |
| 57 | BA                                          | 0   | 1   | 0   | 0 | 1 | 1    | 2    | 2.34 | 28 |
| 58 | BA                                          | 0   | 1   | 0   | 0 | 1 | 1.5  | 1.5  | 2.28 | 28 |
| 59 | BA                                          | 0   | 1   | 0   | 0 | 1 | 2.5  | 1.25 | 2.28 | 28 |
| 60 | BA                                          | 1   | 0   | 0   | 0 | 1 | 1.5  | 1.5  | 2.35 | 29 |
| 61 | PEA                                         | 1   | 0   | 0   | 0 | 1 | 1.5  | 1.5  | 2.41 | 29 |

---

---

|    |                                        |     |      |      |      |      |      |      |      |    |
|----|----------------------------------------|-----|------|------|------|------|------|------|------|----|
| 62 | PEA                                    | 0   | 0    | 1    | 0    | 1    | 1    | 1    | 2.52 | 30 |
| 63 | PBA                                    | 0   | 0    | 1    | 0.3  | 0.7  | 1.39 | 0.8  | 2.53 | 31 |
| 64 | PBA                                    | 0   | 0    | 1    | 0.4  | 0.6  | 1.39 | 0.8  | 2.58 | 31 |
| 65 | PBA                                    | 0   | 0    | 1    | 0.5  | 0.5  | 1.39 | 0.8  | 2.62 | 31 |
| 66 | PBA                                    | 0   | 0    | 1    | 0    | 1    | 1.39 | 0.8  | 2.45 | 31 |
| 67 | PBA                                    | 0   | 0    | 1    | 0.05 | 0.95 | 1.39 | 0.8  | 2.47 | 31 |
| 68 | PBA                                    | 0   | 0    | 1    | 0.1  | 0.9  | 1.39 | 0.8  | 2.48 | 31 |
| 69 | PBA                                    | 0   | 0    | 1    | 0.15 | 0.85 | 1.39 | 0.8  | 2.49 | 31 |
| 70 | PBA                                    | 0   | 0    | 1    | 0.2  | 0.8  | 1.39 | 0.8  | 2.51 | 31 |
| 71 | PBA                                    | 0   | 0    | 1    | 0.25 | 0.75 | 1.39 | 0.8  | 2.52 | 31 |
| 72 | PBA                                    | 0   | 0    | 1    | 0.35 | 0.65 | 1.39 | 0.8  | 2.56 | 31 |
| 73 | PBA                                    | 0   | 0    | 1    | 0.45 | 0.55 | 1.39 | 0.8  | 2.61 | 31 |
| 74 | PEA                                    | 0   | 0    | 1    | 0.3  | 0.7  | 2.5  | 1    | 2.56 | 32 |
| 75 | PEA                                    | 0   | 0    | 1    | 0.3  | 0.7  | 1.67 | 1    | 2.56 | 32 |
| 76 | PEA                                    | 0   | 0    | 1    | 0.3  | 0.7  | 1.25 | 1    | 2.57 | 32 |
| 77 | PEA                                    | 0   | 0    | 1    | 0.3  | 0.7  | 1    | 1    | 2.58 | 32 |
| 78 | PEA                                    | 0   | 0    | 1    | 0.3  | 0.7  | 0.83 | 1    | 2.59 | 32 |
| 79 | PEA                                    | 0   | 0    | 1    | 0.25 | 0.75 | 1    | 1    | 2.60 | 33 |
| 80 | PEA <sub>0.17</sub> PA <sub>0.83</sub> | 0   | 0    | 1    | 0    | 1    | 1    | 1.2  | 2.55 | 34 |
| 81 | PEA                                    | 0   | 0    | 1    | 0.1  | 0.9  | 1.25 | 1    | 2.59 | 35 |
| 82 | PBA                                    | 0   | 0    | 1    | 0    | 1    | 0.6  | 3    | 2.84 | 36 |
| 83 | PBA                                    | 0   | 0    | 1    | 0    | 1    | 0.6  | 1.98 | 2.67 | 36 |
| 84 | PBA                                    | 0   | 0    | 1    | 0    | 1    | 0.67 | 1.67 | 2.55 | 36 |
| 85 | PBA                                    | 0   | 0    | 1    | 0    | 1    | 0.75 | 1.5  | 2.52 | 36 |
| 86 | PEA                                    | 0.2 | 0    | 0.8  | 0.1  | 0.9  | 1.5  | 1.5  | 2.42 | 37 |
| 87 | PEA                                    | 0.2 | 0    | 0.8  | 0.2  | 0.8  | 1.5  | 1.5  | 2.48 | 37 |
| 88 | PEA                                    | 0.2 | 0    | 0.8  | 0.3  | 0.7  | 1.5  | 1.5  | 2.48 | 37 |
| 89 | PEA                                    | 0.2 | 0    | 0.8  | 0    | 1    | 1.5  | 1.5  | 2.54 | 37 |
| 90 | p-F-PEA                                | 0   | 0.11 | 0.89 | 0.5  | 0.5  | 2    | 0.52 | 2.64 | 38 |

---

|     |                                       |      |   |      |   |   |      |      |      |    |
|-----|---------------------------------------|------|---|------|---|---|------|------|------|----|
| 91  | PEA                                   | 0.17 | 0 | 0.83 | 0 | 1 | 1.25 | 1.67 | 2.42 | 39 |
| 92  | PEA <sub>0.4</sub> IPA <sub>0.1</sub> | 0.17 | 0 | 0.83 | 0 | 1 | 1.11 | 1.67 | 2.43 | 39 |
| 93  | PEA <sub>0.4</sub> IPA <sub>0.2</sub> | 0.17 | 0 | 0.83 | 0 | 1 | 1    | 1.67 | 2.45 | 39 |
| 94  | PEA <sub>0.4</sub> IPA <sub>0.4</sub> | 0.17 | 0 | 0.83 | 0 | 1 | 0.83 | 1.67 | 2.51 | 39 |
| 95  | PEA <sub>0.4</sub> IPA <sub>0.6</sub> | 0.17 | 0 | 0.83 | 0 | 1 | 0.71 | 1.67 | 2.62 | 39 |
| 96  | PEA <sub>0.4</sub> IPA <sub>0.4</sub> | 0.25 | 0 | 0.75 | 0 | 1 | 0.83 | 1.67 | 2.53 | 39 |
| 97  | PEA <sub>0.4</sub> IPA <sub>0.4</sub> | 0.33 | 0 | 0.67 | 0 | 1 | 0.83 | 1.67 | 2.62 | 39 |
| 98  | PEA                                   | 0    | 0 | 1    | 0 | 1 | 1.5  | 1.15 | 2.44 | 40 |
| 99  | PEA                                   | 0    | 0 | 1    | 0 | 1 | 1.5  | 0.93 | 2.46 | 40 |
| 100 | PEA                                   | 0    | 0 | 1    | 0 | 1 | 1.5  | 0.83 | 2.50 | 40 |
| 101 | EA                                    | 1    | 0 | 0    | 0 | 1 | 1.18 | 1.54 | 2.56 | 41 |
| 102 | EA                                    | 1    | 0 | 0    | 0 | 1 | 1.33 | 1.33 | 2.41 | 41 |
| 103 | POEA                                  | 1    | 0 | 0    | 0 | 1 | 2.5  | 0.33 | 2.46 | 42 |
| 104 | POEA                                  | 1    | 0 | 0    | 0 | 1 | 1.67 | 0.33 | 2.38 | 42 |
| 105 | POEA                                  | 1    | 0 | 0    | 0 | 1 | 1.25 | 0.33 | 2.44 | 42 |
| 106 | POEA                                  | 1    | 0 | 0    | 0 | 1 | 0.83 | 0.33 | 2.68 | 42 |

a: Abbreviations of the large spacer cations: phenylethylamine (PEA), butylamine (BA), N-(2-Bromoethyl)-1,3-propanediamine (NPA), Propylamine (PA), 4-Phenylbutylamine (PBA), 1,2-Bis(bromomethyl)benzene (P-PDA), 1-naphthylmethylamine (1-NMA), 4-Fluorophenethylamine (p-F-PEA), iso-propylammonium (IPA), 2-phenoxyethylamine (POEA).

Table S2 Summary of the data listed in Table S1

|        | XLogP3 | FA ratio | Cs ratio | Br ratio | P2L   | P2A  | Photon energy |
|--------|--------|----------|----------|----------|-------|------|---------------|
| Min.   | 0.620  | 0.0000   | 0.0000   | 0.4200   | 0.600 | 0.33 | 2.280         |
| Median | 2.370  | 0.0000   | 1.0000   | 1.0000   | 1.390 | 1.00 | 2.465         |
| Mean   | 2.432  | 0.1595   | 0.6619   | 0.9392   | 1.474 | 1.17 | 2.487         |
| Max.   | 3.370  | 1.0000   | 1.0000   | 1.0000   | 2.500 | 3.00 | 2.840         |

Table S3 Parameter settings for quasi-2D perovskite precursor compositions

| Features | P2L | P2A | XLogP3 | Cs | FA | Br |
|----------|-----|-----|--------|----|----|----|
|----------|-----|-----|--------|----|----|----|

|          |                      |                      |                      |                        |                  |                  |
|----------|----------------------|----------------------|----------------------|------------------------|------------------|------------------|
| Settings | 0.6-1.6,<br>step 0.1 | 1.4-2.4,<br>step 0.2 | 1.6-4.0, step<br>0.3 | 0.75-1.0,<br>step 0.05 | =1-(Cs<br>ratio) | 0-1, step<br>0.1 |
|----------|----------------------|----------------------|----------------------|------------------------|------------------|------------------|

## Reference

1. G. Jin, D. Zhang, P. Pang, Z. Ye, T. Liu, G. Xing, J. Chen and D. Ma, *J. Mater. Chem. C*, 2021, **9**, 916-924.
2. L. Kong, X. Zhang, Y. Li, H. Wang, Y. Jiang, S. Wang, M. You, C. Zhang, T. Zhang, S. V. Kershaw, W. Zheng, Y. Yang, Q. Lin, M. Yuan, A. L. Rogach and X. Yang, *Nat. Commun.*, 2021, **12**, 1246.
3. L. Na Quan, D. Ma, Y. Zhao, O. Voznyy, H. Yuan, E. Bladt, J. Pan, F. P. Garcia de Arquer, R. Sabatini, Z. Piontkowski, A. H. Emwas, P. Todorovic, R. Quintero-Bermudez, G. Walters, J. Z. Fan, M. Liu, H. Tan, M. I. Saidaminov, L. Gao, Y. Li, D. H. Anjum, N. Wei, J. Tang, D. W. McCamant, M. B. J. Roeffaers, S. Bals, J. Hofkens, O. M. Bakr, Z. H. Lu and E. H. Sargent, *Nat. Commun.*, 2020, **11**, 170.
4. Y.-K. Wang, D. Ma, F. Yuan, K. Singh, J. M. Pina, A. Johnston, Y. Dong, C. Zhou, B. Chen, B. Sun, H. Ebe, J. Fan, M.-J. Sun, Y. Gao, Z.-H. Lu, O. Voznyy, L.-S. Liao and E. H. Sargent, *Nat. Commun.*, 2020, **11**, 3674.
5. X. Yang, X. Zhang, J. Deng, Z. Chu, Q. Jiang, J. Meng, P. Wang, L. Zhang, Z. Yin and J. You, *Nat. Commun.*, 2018, **9**, 570.
6. R. Wang, Y. Zhang, X.-J. Ma, Y.-H. Deng, J.-W. Shi, X.-C. Wang, Y.-L. Jia, Q. Xu, Z.-H. Xiong and C.-H. Gao, *J. Mater. Chem. C*, 2020, **8**, 9845-9853.
7. Q.-W. Liu, S. Yuan, S.-Q. Sun, W. Luo, Y.-J. Zhang, L.-S. Liao and M.-K. Fung, *J. Mater. Chem. C*, 2019, **7**, 4344-4349.
8. S. Yuan, B. Han, T. Fang, Q. Shan and J. Song, *ACS Appl. Electron. Mater.*, 2020, **2**, 3530-3537.
9. P. Vashishtha, M. Ng, S. B. Shivarudraiah and J. E. Halpert, *Chem. Mater.*, 2018, **31**, 83-89.
10. P. Xia, Y. Lu, Y. Li, W. Zhang, W. Shen, J. Qian, Y. Wu, W. Zhu, H. Yu, L. Liu, L. Deng and S. Chen, *ACS Appl. Mater. Interfaces*, 2020, **12**, 39720-39729.
11. B. Han, S. Yuan, T. Fang, F. Zhang, Z. Shi and J. Song, *ACS Appl. Mater. Interfaces*, 2020, **12**, 14224-14232.
12. M. Worku, Q. He, L. J. Xu, J. Hong, R. X. Yang, L. Z. Tan and B. Ma, *ACS Appl. Mater. Interfaces*, 2020, **12**, 45056-45063.
13. L. Lei, D. Seyitliyev, S. Stuard, J. Mendes, Q. Dong, X. Fu, Y. A. Chen, S. He, X. Yi, L. Zhu, C. H. Chang, H. Ade, K. Gundogdu and F. So, *Adv. Mater.*, 2020, **32**, 1906571.
14. S. Lee, C. H. Jang, T. L. Nguyen, S. H. Kim, K. M. Lee, K. Chang, S. S. Choi, S. K. Kwak, H. Y. Woo and M. H. Song, *Adv. Mater.*, 2019, **31**, e1900067.
15. Y. Jin, Z. K. Wang, S. Yuan, Q. Wang, C. Qin, K. L. Wang, C. Dong, M. Li, Y. Liu and L. S. Liao, *Adv. Funct. Mater.*, 2019, **30**, 1908339.
16. Z. Ren, X. Xiao, R. Ma, H. Lin, K. Wang, X. W. Sun and W. C. H. Choy, *Adv. Funct. Mater.*, 2019, **29**, 1905339.
17. F. Meng, X. Liu, Y. Chen, X. Cai, M. Li, T. Shi, Z. Chen, D. Chen, H. L. Yip, C. Ramanan, P. W. M. Blom and S. J. Su, *Adv. Funct. Mater.*, 2020, **30**, 1910167.
18. T. Cheng, C. Qin, S. Watanabe, T. Matsushima and C. Adachi, *Adv. Funct. Mater.*, 2020, **30**, 9.

19. Z. Wang, F. Wang, W. Sun, R. Ni, S. Hu, J. Liu, B. Zhang, A. Alsaed, T. Hayat and Z. a. Tan, *Adv. Funct. Mater.*, 2018, **28**, 10.
20. S. Yuan, Z. K. Wang, L. X. Xiao, C. F. Zhang, S. Y. Yang, B. B. Chen, H. T. Ge, Q. S. Tian, Y. Jin and L. S. Liao, *Adv. Mater.*, 2019, **31**, e1904319.
21. C. Qin, T. Matsushima, W. J. Potscavage, A. S. D. Sandanayaka, M. R. Leyden, F. Bencheikh, K. Goushi, F. Mathevet, B. Heinrich, G. Yumoto, Y. Kanemitsu and C. Adachi, *Nat. Photonics*, 2019, **14**, 70-75.
22. Y. Liu, J. Cui, K. Du, H. Tian, Z. He, Q. Zhou, Z. Yang, Y. Deng, D. Chen, X. Zuo, Y. Ren, L. Wang, H. Zhu, B. Zhao, D. Di, J. Wang, R. H. Friend and Y. Jin, *Nat. Photonics*, 2019, **13**, 760-764.
23. Z. Ren, L. Li, J. Yu, R. Ma, X. Xiao, R. Chen, K. Wang, X. W. Sun, W.-J. Yin and W. C. H. Choy, *ACS Energy Lett.*, 2020, **5**, 2569-2579.
24. P. Xia, Y. Lu, H. Yu, Y. Li, W. Zhu, X. Xu, W. Zhang, J. Qian, W. Shen, L. Liu, L. Deng and S. Chen, *Nanoscale*, 2019, **11**, 20847-20856.
25. Y. Han, S. Park, C. Kim, M. Lee and I. Hwang, *Nanoscale*, 2019, **11**, 3546-3556.
26. X. Yang, Z. Chu, J. Meng, Z. Yin, X. Zhang, J. Deng and J. You, *J. Phys. Chem. Lett.*, 2019, **10**, 2892-2897.
27. J. H. Warby, B. Wenger, A. J. Ramadan, R. D. J. Oliver, H. C. Sansom, A. R. Marshall and H. J. Snaith, *ACS Nano*, 2020, **14**, 8855-8865.
28. S. Lee, D. B. Kim, I. Hamilton, M. Daboczi, Y. S. Nam, B. R. Lee, B. Zhao, C. H. Jang, R. H. Friend, J. S. Kim and M. H. Song, *Adv. Sci. (Weinheim, Ger.)*, 2018, **5**, 1801350.
29. H. Tsai, C. Liu, E. Kinigstein, M. Li, S. Tretiak, M. Cotlet, X. Ma, X. Zhang and W. Nie, *Adv. Sci. (Weinheim, Ger.)*, 2020, **7**, 1903202.
30. S. Kang, R. Jillella, J. Jeong, Y. I. Park, Y. J. Pu and J. Park, *ACS Appl. Mater. Interfaces*, 2020, **12**, 51756-51765.
31. K.-H. Wang, Y. Peng, J. Ge, S. Jiang, B.-S. Zhu, J. Yao, Y.-C. Yin, J.-N. Yang, Q. Zhang and H.-B. Yao, *ACS Photonics*, 2018, **6**, 667-676.
32. Z. Li, Z. Chen, Y. Yang, Q. Xue, H. L. Yip and Y. Cao, *Nat. Commun.*, 2019, **10**, 1027.
33. Q. Wang, X. Wang, Z. Yang, N. Zhou, Y. Deng, J. Zhao, X. Xiao, P. Rudd, A. Moran, Y. Yan and J. Huang, *Nat. Commun.*, 2019, **10**, 5633.
34. Z. Ren, J. Yu, Z. Qin, J. Wang, J. Sun, C. C. S. Chan, S. Ding, K. Wang, R. Chen, K. S. Wong, X. Lu, W. J. Yin and W. C. H. Choy, *Adv. Mater.*, 2020, **33**, 10.
35. P. Pang, G. Jin, C. Liang, B. Wang, W. Xiang, D. Zhang, J. Xu, W. Hong, Z. Xiao, L. Wang, G. Xing, J. Chen and D. Ma, *Acs Nano*, 2020, **14**, 11420-11430.
36. N. Yantara, N. F. Jamaludin, B. Febriansyah, D. Giovanni, A. Bruno, C. Soci, T. C. Sum, S. Mhaisalkar and N. Mathews, *ACS Energy Lett.*, 2020, **5**, 1593-1600.
37. D. Ma, P. Todorovic, S. Meshkat, M. I. Saidaminov, Y. K. Wang, B. Chen, P. Li, B. Scheffel, R. Quintero-Bermudez, J. Z. Fan, Y. Dong, B. Sun, C. Xu, C. Zhou, Y. Hou, X. Li, Y. Kang, O. Voznyy, Z. H. Lu, D. Ban and E. H. Sargent, *J. Am. Chem. Soc.*, 2020, **142**, 5126-5134.
38. Y. Shen, K. C. Shen, Y. Q. Li, M. L. Guo, J. K. Wang, Y. C. Ye, F. M. Xie, H. Ren, X. Y. Gao, F. Song and J. X. Tang, *Adv. Funct. Mater.*, 2021, **31**, 9.
39. J. Xing, Y. Zhao, M. Askerka, L. N. Quan, X. Gong, W. Zhao, J. Zhao, H. Tan, G. Long, L. Gao, Z. Yang, O. Voznyy, J. Tang, Z. H. Lu, Q. Xiong and E. H. Sargent, *Nat. Commun.*, 2018, **9**, 3541.

40. Y. Shang, G. Li, W. Liu and Z. Ning, *Adv. Funct. Mater.*, 2018, **28**.
41. Q. Wang, J. Ren, X. F. Peng, X. X. Ji and X. H. Yang, *ACS Appl. Mater. Interfaces*, 2017, **9**, 29901-29906.
42. Z. M. Chen, C. Y. Zhang, X. F. Jiang, M. Y. Liu, R. X. Xia, T. T. Shi, D. C. Chen, Q. F. Xue, Y. J. Zhao, S. J. Su, H. L. Yip and Y. Cao, *Adv. Mater.*, 2017, **29**, 8.
